# Supplementary material for: Vitamin D Status Is Not Associated with Cognitive or Motor Function in Pre-School Ugandan Children
Source: PubMed Central journal article supplement (PMC7352320; doi:10.3390/nu12061662), 2020-06-03
Supplement: nutrients-12-01662-s001.pdf [file nutrients-12-01662-s001.pdf]

---

**SUPPLEMENTARY MATERIAL**

|                                                                                                                                                                                                                                                |   |
|------------------------------------------------------------------------------------------------------------------------------------------------------------------------------------------------------------------------------------------------|---|
| <b>Table S1:</b> Comparison of baseline characteristics between children who were included in this analysis and children who were excluded due to loss to follow up or death or missing 25(OH)D and/ or cognitive and motor outcome data. .... | 2 |
| <b>Table S2:</b> Summary of cognitive and motor development scores. ....                                                                                                                                                                       | 3 |
| <b>Table S3:</b> Univariable linear regression results for the association between participant characteristics and cognitive and motor outcomes. ....                                                                                          | 4 |

**Table S1:** Comparison of baseline characteristics between children who were included in this analysis and children who were excluded due to loss to follow up or death or missing 25(OH)D and/or cognitive and motor outcome data.

| Characteristics                                                      | Included participants (n=302) | Non-participants (n=2043) | P value* |
|----------------------------------------------------------------------|-------------------------------|---------------------------|----------|
| Male sex (n,%)                                                       | 146 (48.3)                    | 550 (51.3)                | 0.36     |
| Stunting at 5 years                                                  | 101 (34.4)                    | 193 (65.7)                | 0.003    |
| Underweight at 5 years b                                             | 33 (11.1)                     | 94 (9.9)                  | 0.56     |
| Wasting at 5 years c                                                 | 14 (4.7)                      | 74 (7.9)                  | 0.07     |
| Helminthic infections between birth and 5 years (n, %)               | 54 (17.9)                     | 162 (15.2)                | 0.27     |
| Asymptomatic malaria between birth and 5 years (n, %)                | 34 (11.3)                     | 181 (16.9)                | 0.02     |
| Malaria episodes between birth and 5 years (n, %)                    |                               |                           |          |
| None                                                                 | 135 (44.7)                    | 911 (47.2)                |          |
| 1                                                                    | 65 (21.5)                     | 406 (21.0)                |          |
| ≥2                                                                   | 102 (33.8)                    | 615 (31.8)                | 0.71     |
| Maternal age (n,%)                                                   |                               |                           |          |
| 14-24                                                                | 165 (54.6)                    | 663 (61.9)                |          |
| 25-34                                                                | 110 (36.4)                    | 365 (34.1)                |          |
| 35+                                                                  | 27 (8.9)                      | 44 (4.1)                  | 0.001    |
| Maternal education at enrollment to EMaBS                            |                               |                           |          |
| Primary/ none                                                        | 165 (54.8)                    | 577 (53.9)                |          |
| Secondary                                                            | 114 (37.9)                    | 391 (36.5)                |          |
| Tertiary                                                             | 22 (7.3)                      | 102 (9.5)                 | 0.49     |
| Parity (n, %)                                                        |                               |                           |          |
| 1                                                                    | 54 (17.9)                     | 301 (28.1)                |          |
| 2-4                                                                  | 179 (59.3)                    | 611 (57.0)                |          |
| 5+                                                                   | 69 (22.9)                     | 160 (14.9)                | <0.001   |
| Household socioeconomic status recorded at EMaBS enrollment g (n, %) |                               |                           |          |
| 1 (low)                                                              | 16 (5.4)                      | 50 (4.7)                  |          |
| 2                                                                    | 16 (5.4)                      | 100 (9.5)                 |          |
| 3                                                                    | 82 (27.6)                     | 336 (31.9)                |          |
| 4                                                                    | 89 (29.9)                     | 298 (28.3)                |          |
| 5                                                                    | 69 (23.2)                     | 216 (20.5)                |          |
| 6 (high)                                                             | 25 (8.4)                      | 54 (5.1)                  | 0.04     |
| Location recorded at EMaBS enrolment (n, %)                          |                               |                           |          |
| Urban                                                                | 118 (39.1)                    | 477 (45.1)                |          |
| Peri-urban                                                           | 79 (26.2)                     | 211 (19.9)                |          |
| Rural                                                                | 105 (34.8)                    | 370 (34.9)                | 0.06     |

\*P value is from Pearson's chi-squared test

**Table S2:** Summary of cognitive and motor development scores.

| Domain tested            | Measure                  | N   | Obtained Mean (SD) scores | Obtained scores (min, max) | Absolute scores (min, max) |
|--------------------------|--------------------------|-----|---------------------------|----------------------------|----------------------------|
| Verbal and non-verbal IQ | Block design             | 333 | 8.4 (3.3)                 | 0, 16                      | 0, 16                      |
|                          | Picture vocabulary scale | 336 | 17.4 (3.1)                | 6, 24                      | 0, 24                      |
| Executive function       | Verbal fluency           | 322 | 14.2 (7.8)                | 0, 36                      | a                          |
|                          | Picture search           | 336 | 4.1 (1.4)                 | 0.3, 7.7                   | b                          |
|                          | Wisconsin card sort test | 334 | 6.3 (3.9)                 | 0, 12                      | 0,12                       |
| Motor function           | Coin box                 | 330 | 9.9 (1.7)                 | 3.5, 16.5                  | 0, 20*                     |
|                          | Balancing on one leg     | 328 | 15.2 (11.3)               | 1.5, 57.5                  | 0, 60*                     |

SD, standard deviation; IQ, intelligence quotient; Min, minimum score; Max, maximum score. <sup>a</sup> One point is awarded for each correct name and a total score is calculated from the total correct names in a minute. <sup>b</sup> An average score is calculated from the total copies of pictures identified within 10 seconds.

\*An average score is calculated after timed attempts of the tests.

Higher scores for the cognitive and motor tests indicate better performance.

**Table S3:** Univariable linear regression results for the association between participant characteristics and cognitive and motor outcomes.

| Characteristics                               | Verbal and non-verbal IQ |         | Executive function  |         | Motor function      |         |
|-----------------------------------------------|--------------------------|---------|---------------------|---------|---------------------|---------|
|                                               | $\beta$ (95% CI)         | P value | $\beta$ (95% CI)    | P value | $\beta$ (95% CI)    | P value |
| <b>Child characteristics</b>                  |                          |         |                     |         |                     |         |
| Age at 25(OH)D measurement (years)<br>(n=302) |                          |         |                     |         |                     |         |
| 1                                             | 0.01 (-0.84, 0.85)       |         | -0.38 (-1.19, 0.44) |         | -0.43 (-1.14, 0.28) |         |
| 2                                             | Reference                |         | Reference           |         | Reference           |         |
| 3                                             | -0.17 (-0.55, 0.21)      |         | -0.23 (-0.59, 0.13) |         | -0.18 (-0.49, 0.13) |         |
| 4                                             | -0.36 (-0.93, 0.22)      | 0.17*   | 0.02 (-0.53, 0.58)  | 0.79*   | -0.07 (-0.55, 0.41) | 0.71*   |
| Sex (n=302)                                   |                          |         |                     |         |                     |         |
| Male                                          | Reference                |         | Reference           |         | Reference           |         |
| Female                                        | -0.19 (-0.49, 0.10)      | 0.19    | 0.34 (0.05, 0.63)   | 0.02    | 0.32 (0.07, 0.57)   | 0.01    |
| Height-for-age Z-scores (n=294)               |                          |         |                     |         |                     |         |
| Normal (>-2 SD)                               | Reference                |         | Reference           |         | Reference           |         |
| Stunted (<-2 SD)                              | -0.44(-0.75, -0.12)      | 0.01    | -0.15 (-0.46, 0.16) | 0.35    | -0.08 (-0.35, 0.19) | 0.56    |
| Weight-for-age Z-scores (n=297)               |                          |         |                     |         |                     |         |
| Normal (>-2 SD)                               | Reference                |         | Reference           |         | Reference           |         |
| Underweight (<-2 SD)                          | -0.29 (-0.77, 0.19)      | 0.23    | -0.14 (-0.61, 0.33) | 0.56    | -0.03 (-0.43, 0.38) | 0.89    |
| Weight-for- height Z-scores (n=297)           |                          |         |                     |         |                     |         |
| Normal (>-2 SD)                               | Reference                |         | Reference           |         | Reference           |         |
| Wasted (<-2 SD)                               | 0.17, (-0.54, 0.88)      | 0.64    | -0.20 (-0.89, 0.49) | 0.57    | -0.01 (-0.59, 0.61) | 0.99    |
| Helminthic infection (n=302)                  |                          |         |                     |         |                     |         |
| Negative                                      | Reference                |         | Reference           |         | Reference           |         |
| Positive                                      | -0.10 (-0.49, 0.30)      | 0.63    | -0.15 (-0.53, 0.23) | 0.43    | -0.27 (-0.60, 0.06) | 0.11    |
| Asymptomatic malaria parasitemia (n=302)      |                          |         |                     |         |                     |         |
| Negative                                      | Reference                |         | Reference           |         | Reference           |         |
| Positive                                      | -0.23 (-0.71, 0.24)      | 0.34    | -0.37 (-0.83, 0.09) | 0.12    | -0.05 (-0.45, 0.35) | 0.79    |
| Malaria episodes (n=302)                      |                          |         |                     |         |                     |         |
| None                                          | Reference                |         | Reference           |         | Reference           |         |
| 1                                             | -0.14 (-0.53, 0.25)      |         | -0.05 (-0.43, 0.34) |         | 0.01 (-0.32, 0.34)  |         |

| Characteristics                                          | Verbal and non-verbal IQ |         | Executive function  |         | Motor function       |         |
|----------------------------------------------------------|--------------------------|---------|---------------------|---------|----------------------|---------|
|                                                          | $\beta$ (95% CI)         | P value | $\beta$ (95% CI)    | P value | $\beta$ (95% CI)     | P value |
| $\geq 2$                                                 | -0.30 (-0.64, 0.4)       | 0.08*   | -0.08 (-0.42, 0.25) | 0.62*   | -0.03 (-0.32, 0.26)  | 0.86*   |
| <sup>1</sup> Haemoglobin (n=286)                         |                          |         |                     |         |                      |         |
| Normal                                                   | Reference                |         | Reference           |         | Reference            |         |
| Anaemia                                                  | -0.22 (-0.54, 0.10)      | 0.18    | -0.15 (-0.46, 0.16) | 0.34    | 0.04 (-0.24, 0.31)   | 0.78    |
| <sup>2</sup> Iron status (n=288)                         |                          |         |                     |         |                      |         |
| Normal                                                   | Reference                |         | Reference           |         | Reference            |         |
| Iron deficient                                           | 0.31 (-0.04, 0.65)       | 0.08    | -0.06 (-0.39, 0.28) | 0.73    | 0.20 (-0.09, 0.49)   | 0.18    |
| <sup>3</sup> Inflammation (n=299)                        |                          |         |                     |         |                      |         |
| No                                                       | Reference                |         | Reference           |         | Reference            |         |
| Yes                                                      | -0.13 (-0.49, 0.23)      | 0.48    | -0.23 (-0.57, 0.12) | 0.20    | -0.11 (-0.41, 0.18)  | 0.45    |
| <sup>4</sup> Child Albendazole (ABZ) treatment (n=302)   |                          |         |                     |         |                      |         |
| ABZ                                                      | Reference                |         | Reference           |         | Reference            |         |
| Placebo                                                  | 0.13 (-0.17, 0.43)       | 0.39    | -0.06 (-0.36, 0.23) | 0.67    | -0.31 (-0.56, -0.06) | 0.01    |
| <b>Maternal characteristics</b>                          |                          |         |                     |         |                      |         |
| Age (years) (n=302)                                      |                          |         |                     |         |                      |         |
| 14-24                                                    | Reference                |         | Reference           |         |                      |         |
| 25-34                                                    | -0.05 (-0.37, 0.27)      |         | 0.22 (-0.09, 0.53)  |         | -0.16 (-0.43, 0.11)  |         |
| 35+                                                      | 0.13 (-0.41, 0.67)       | 0.87*   | -0.39 (-0.91, 0.13) | 0.78*   | -0.28 (-0.73, 0.17)  | 0.13*   |
| Education (n=301)                                        |                          |         |                     |         |                      |         |
| Primary/none                                             | -0.68 (-1.27, -0.10)     |         | -0.39 (-0.96, 0.18) |         | 0.17 (-0.33, 0.67)   |         |
| Secondary                                                | -0.23 (-0.82, 0.37)      |         | -0.12 (-0.71, 0.47) |         | 0.22 (-0.29, 0.73)   |         |
| Tertiary                                                 | Reference                | 0.001*  | Reference           | 0.05*   | Reference            | 0.82*   |
| Parity (n=302)                                           |                          |         |                     |         |                      |         |
| 1                                                        | Reference                |         | Reference           |         | Reference            |         |
| 2-4                                                      | -0.07 (-0.48, 0.33)      |         | -0.18 (-0.57, 0.21) |         | 0.04 (-0.30, 0.38)   |         |
| 5+                                                       | -0.19 (-0.67, 0.28)      | 0.40*   | -0.28 (-0.84, 0.08) | 0.10*   | -0.14 (-0.54, 0.26)  | 0.43*   |
| <sup>4</sup> ABZ treatment in pregnancy (n=302)          |                          |         |                     |         |                      |         |
| ABZ                                                      | Reference                |         | Reference           |         | Reference            |         |
| Placebo                                                  | -0.11 (-0.41, 0.19)      | 0.46    | -0.07 (-0.36, 0.22) | 0.64    | 0.02 (-0.23, 0.28)   | 0.85    |
| <sup>4</sup> Praziquantel treatment in pregnancy (n=302) |                          |         |                     |         |                      |         |

| Characteristics                        | Verbal and non-verbal IQ |         | Executive function   |         | Motor function      |         |
|----------------------------------------|--------------------------|---------|----------------------|---------|---------------------|---------|
|                                        | $\beta$ (95% CI)         | P value | $\beta$ (95% CI)     | P value | $\beta$ (95% CI)    | P value |
| Praziquantel                           | Reference                |         | Reference            |         | Reference           |         |
| Placebo                                | 0.14 (-0.16, 0.44)       | 0.35    | -0.07 (-0.36, 0.23)  | 0.66    | 0.17 (-0.08, 0.42)  | 0.18    |
| Household socioeconomic status (n=297) |                          |         |                      |         |                     |         |
| 1(Lowest)                              | -0.63 (-1.46, 0.19)      |         | -0.16 (-0.96, 0.65)  |         | 0.38 (-0.32, 1.08)  |         |
| 2                                      | -0.47 (-1.29, 0.35)      |         | -0.48 (-1.28, 0.33)  |         | -0.12 (-0.82, 0.58) |         |
| 3                                      | -0.29 (-0.87, 0.30)      |         | -0.23 (-0.81, 0.34)  |         | 0.39 (-0.11, 0.89)  |         |
| 4                                      | -0.23 (-0.82, 0.35)      |         | -0.20 (-0.77, 0.37)  |         | 0.45 (-0.04, 0.95)  |         |
| 5                                      | 0.34 (-0.26, 0.94)       |         | 0.19 (-0.39, 0.78)   |         | 0.41 (-0.10, 0.92)  |         |
| 6 (Highest)                            | Reference                | 0.002*  | Reference            | 0.06*   | Reference           | 0.89*   |
| Household Location (n=302)             |                          |         |                      |         |                     |         |
| Urban                                  | Reference                |         | Reference            |         | Reference           |         |
| Peri-urban                             | -0.16 (-0.54, 0.21)      |         | -0.47 (-0.83, -0.10) |         | -0.15 (-0.47, 0.17) |         |
| Rural                                  | -0.18 (-0.53, 0.17)      | 0.29*   | -0.35 (-0.68, -0.01) | 0.04*   | 0.002 (-0.29, 0.29) | 0.99*   |

CI, confidence interval; SD, standard deviation. <sup>1</sup>Anaemia was defined as haemoglobin <11g/dL; <sup>2</sup>iron deficiency as ferritin <12  $\mu$ g/L; <sup>3</sup>inflammation as C-reactive protein >5 mg/L; <sup>4</sup>anthelmintic treatment in primary study. \*P value for linear trend.
